# Supplementary material for: Functional Analysis of Esterase TCE2 Gene from Tetranychus cinnabarinus (Boisduval) involved in Acaricide Resistance
Source: PubMed Central journal article supplement (PMC4698665; doi:10.1038/srep18646), 2016-01-04
Supplement: srep18646-s1.pdf [file srep18646-s1.pdf]

## Supplementary Information

Address Correspondence to:

Dr. Lin He

Key Laboratory of Entomology and

Pest Control Engineering

College of Plant Protection

Southwest University

Chongqing, China

Phone: +86-23-68251541

Fax: +86-23-68251514

E-mail: helinok@vip.tom.com

Dr. Qiang Xu

Department of Biology

ACU Box 27868

College of Arts and Sciences

Abilene Christian University

Abilene, Texas 79699 U.S.A.

Phone: +1-325-674-4883

Fax: +1-325-674-2009

E-mail: qxx07a@acu.edu

### **Functional Analysis of Esterase *TCE2* Gene from *Tetranychus cinnabarinus* (Boisduval) involved in Acaricide Resistance**

Li Shi<sup>1\*</sup>, Peng Wei<sup>1\*</sup>, Xiangzun Wang<sup>1\*</sup>, Guangmao Shen<sup>1</sup>, Jiao Zhang<sup>1</sup>, Wei Xiao<sup>1</sup>,  
Zhifeng Xu<sup>1</sup>, Qiang Xu<sup>2¶</sup>, Lin He<sup>1¶</sup>

<sup>1</sup>Key Laboratory of Entomology and Pest Control Engineering, College of Plant Protection, Southwest University, Chongqing, China;

<sup>2</sup>Department of Biology, Abilene Christian University, Abilene, Texas, U.S.A.

\*These three authors contributed equally to this work.

¶To whom correspondence should be addressed

## Supplementary Information

Table S1. Primers used for RNAi, heterologous expression and qPCR

| Genes         | GenBank No. | Experiments             | Primer names and sequences (5' to 3')                                                       | Product length (bp) | Amplification efficiency (%) |
|---------------|-------------|-------------------------|---------------------------------------------------------------------------------------------|---------------------|------------------------------|
| GFP           | ACY56286    | RNAi                    | F:taatacgactcactatagggGCAGTTCCTGTTGAATTAGATG<br>R:taatacgactcactatagggTTTGGTTTGTCTCCCATGATG | 476                 | -                            |
|               |             | RNAi                    | F:taatacgactcactatagggTCGGCGGCAATCCTGATCAA<br>R:taatacgactcactatagggTCACAGGGTAAAATTCAGCA    | 313                 | -                            |
| TCE2          | EU130462    | Heterologous expression | F: CCGGAATTCGATGTAAGTGAGGAACCAAC<br>R: CCGCTCGAGTCAAAGTTCATCATGGT                           | 1614                | -                            |
|               |             | qPCR                    | F: CCATCCAAAACACCGATTTTC<br>R: CTTCCCAAGCATTTCATCAT                                         | 161                 | 91.3                         |
| RPS18         | FJ608659    | qPCR                    | F: ACGTGCTGGTGAACCTTACCGAAGA<br>R: TGCCTATTCAAGAACCAAAGTGGG                                 | 99                  | 98.5                         |
| $\alpha$ -TUB | FJ526336    | qPCR                    | F:ACTACGCTCGTGCCACTATACAA<br>R:ACCAGATCCAGTTCACCTCCAAA                                      | 140                 | 97.4                         |

Underlines indicate EcoR I and Xba I restriction enzyme cutting sites
